# Supplementary material for: The level of BMP4 signaling is critical for the regulation of distinct T-box gene expression domains and growth along the dorso-ventral axis of the optic cup
Source: PubMed Central journal article supplement (PMC1764729; doi:10.1186/1471-213x-6-62), 2006-12-15

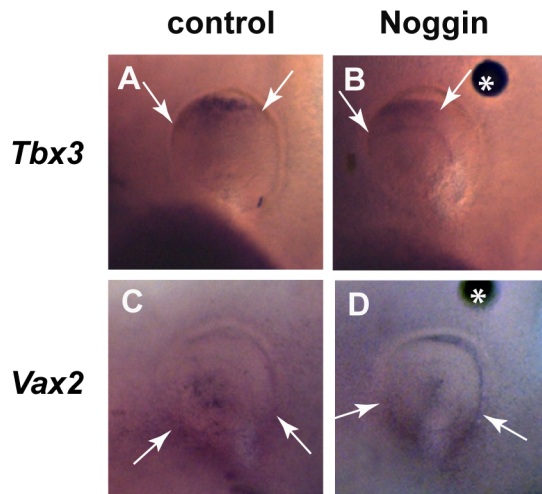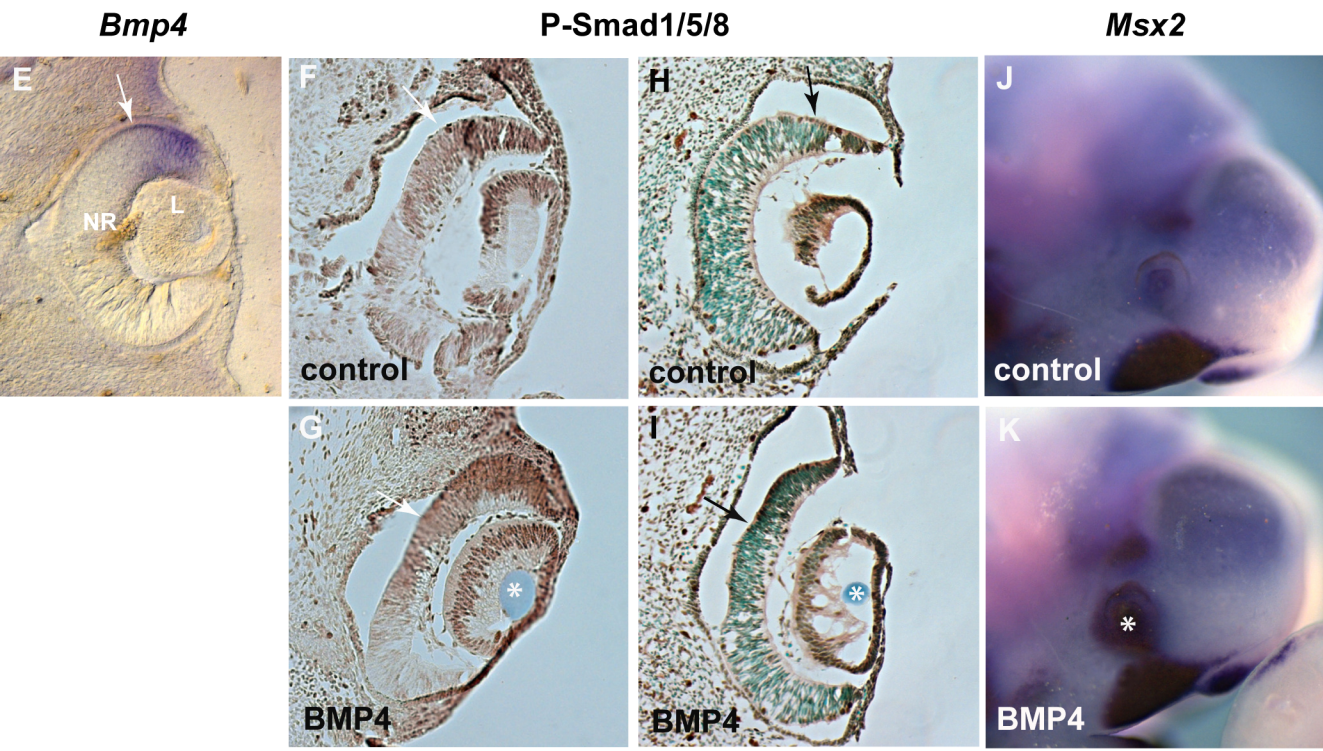

Supplement: 1471-213X-6-62-S1.pdf [file 1471-213X-6-62-S1.pdf]
